# Supplementary figures and images for: A Fish and Dolphin Biophony in the Boat Noise-Dominated Soundscape of the Cres-Lošinj Archipelago (Croatia)
Source: MDPI journal article supplement (doi:10.3390/jmse10020300), 2022-02-21

## Non- tourist season

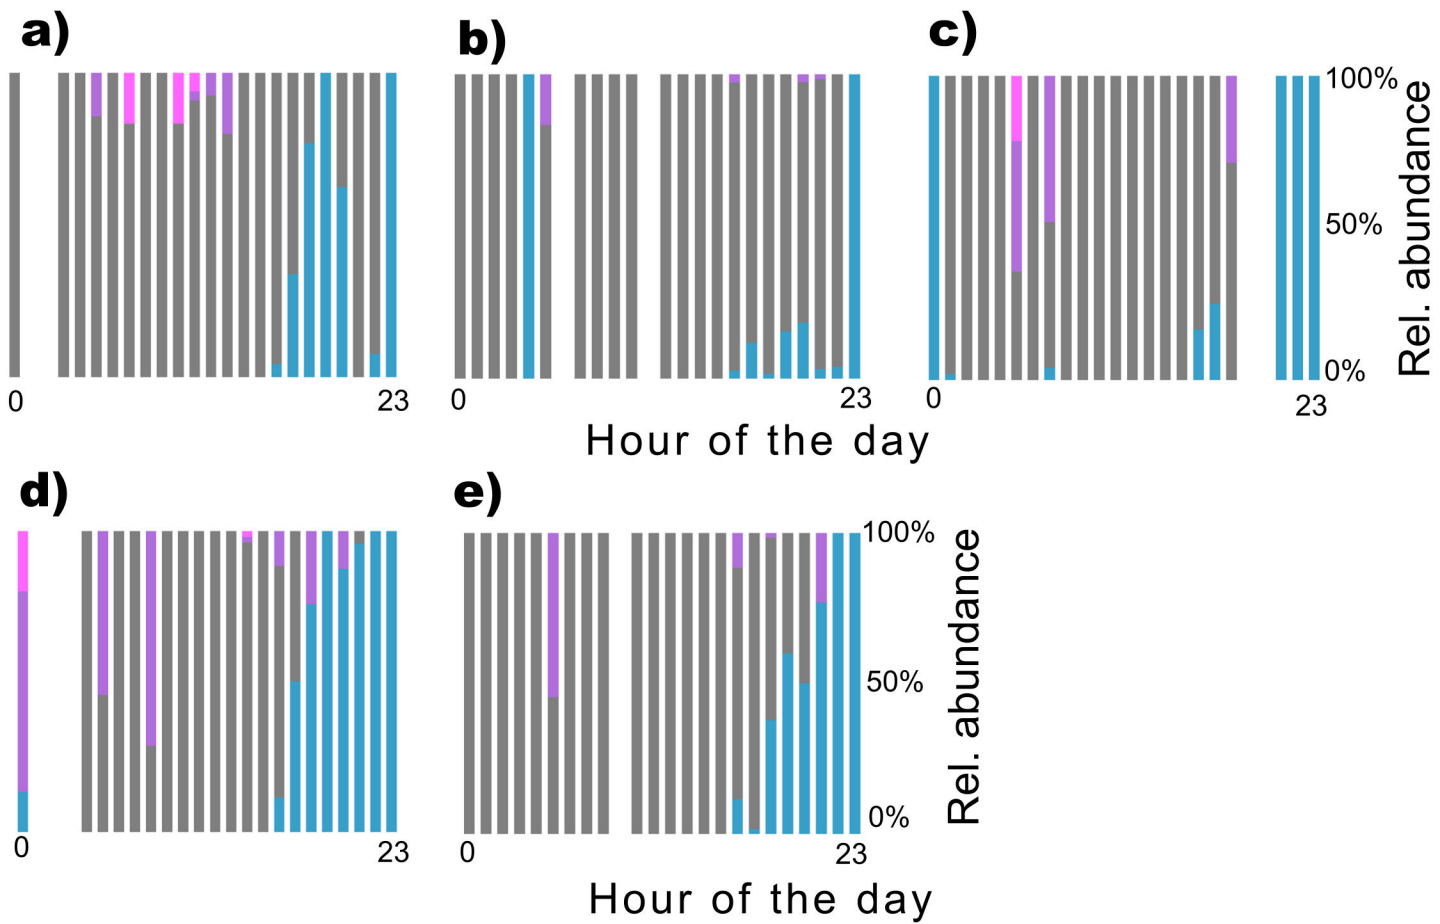

## Tourist season

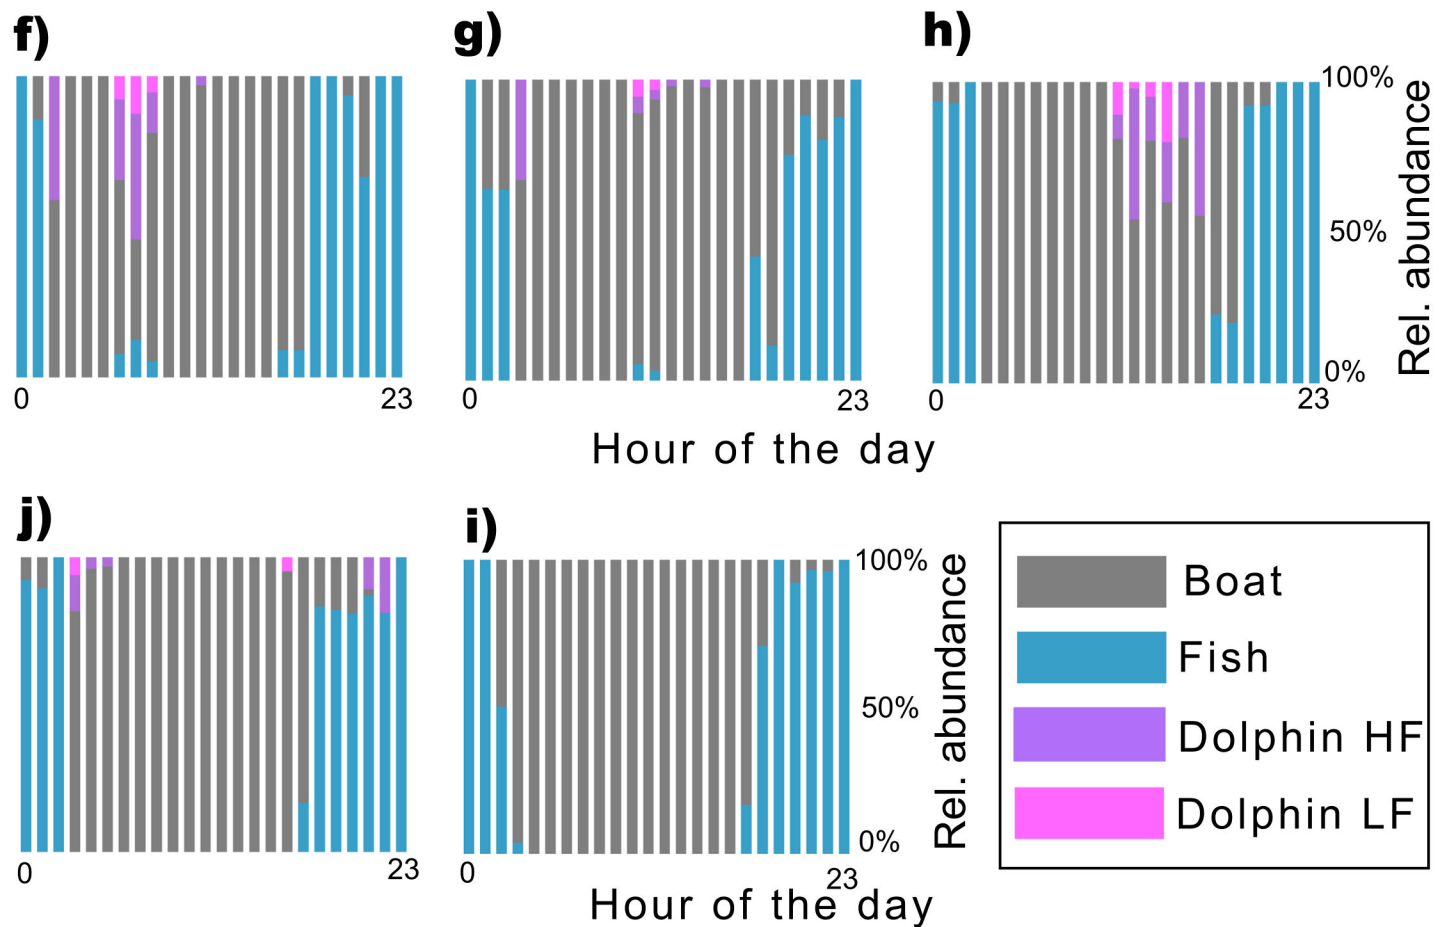

Supplement: s1 [file s1]
